# Supplementary material for: A comparative genomic analysis between methicillin-resistant Staphylococcus aureus strains of hospital acquired and community infections in Yunnan province of China
Source: PubMed Central journal article supplement (PMC7020539; doi:10.1186/s12879-020-4866-6), 2020-02-13

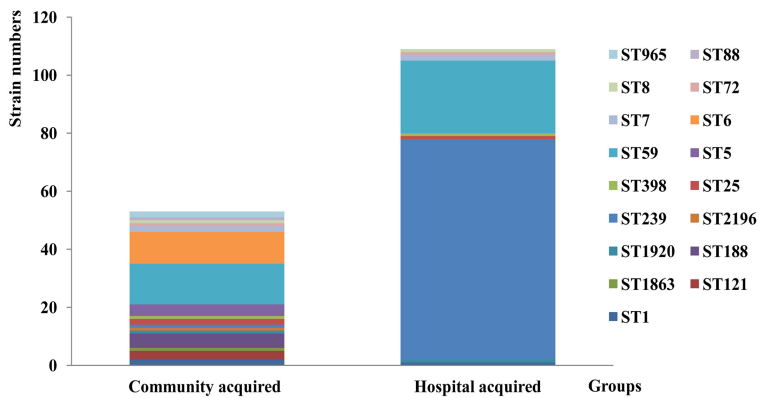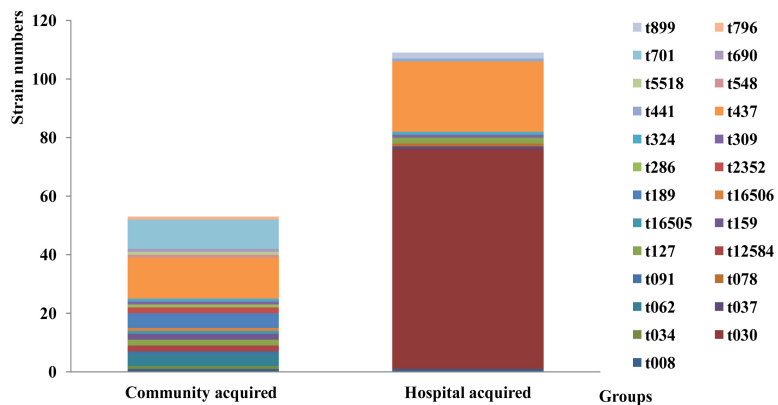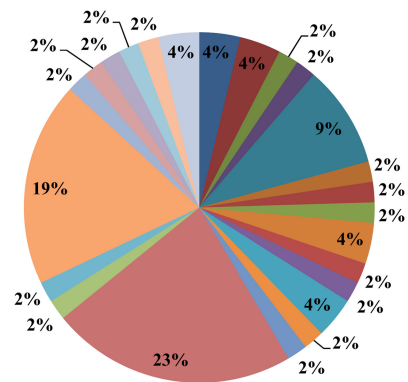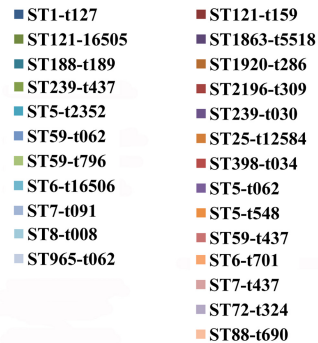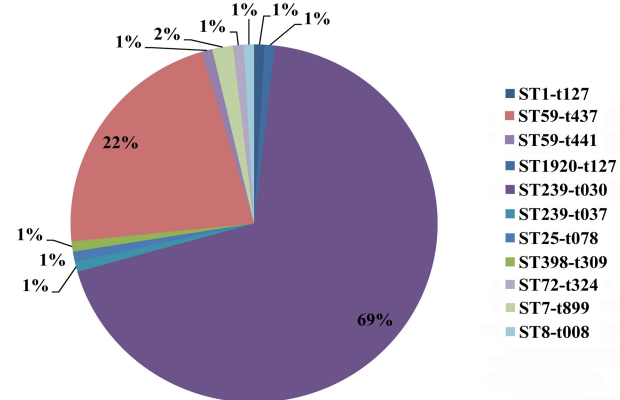

Supplement: 12879_2020_4866_MOESM2_ESM.pdf [file 12879_2020_4866_MOESM2_ESM.pdf]
